# Supplementary material for: Application of Generalized Split Linearized Bregman Iteration algorithm for Alzheimer's disease prediction
Source: publisher site journal article supplement (doi:10.18632/aging.103017), 2020-04-05
Supplement: Supplementary file [file aging-v12i7-103017-supplementary-material-SD1.pdf]

## SUPPLEMENTARY FIGURE

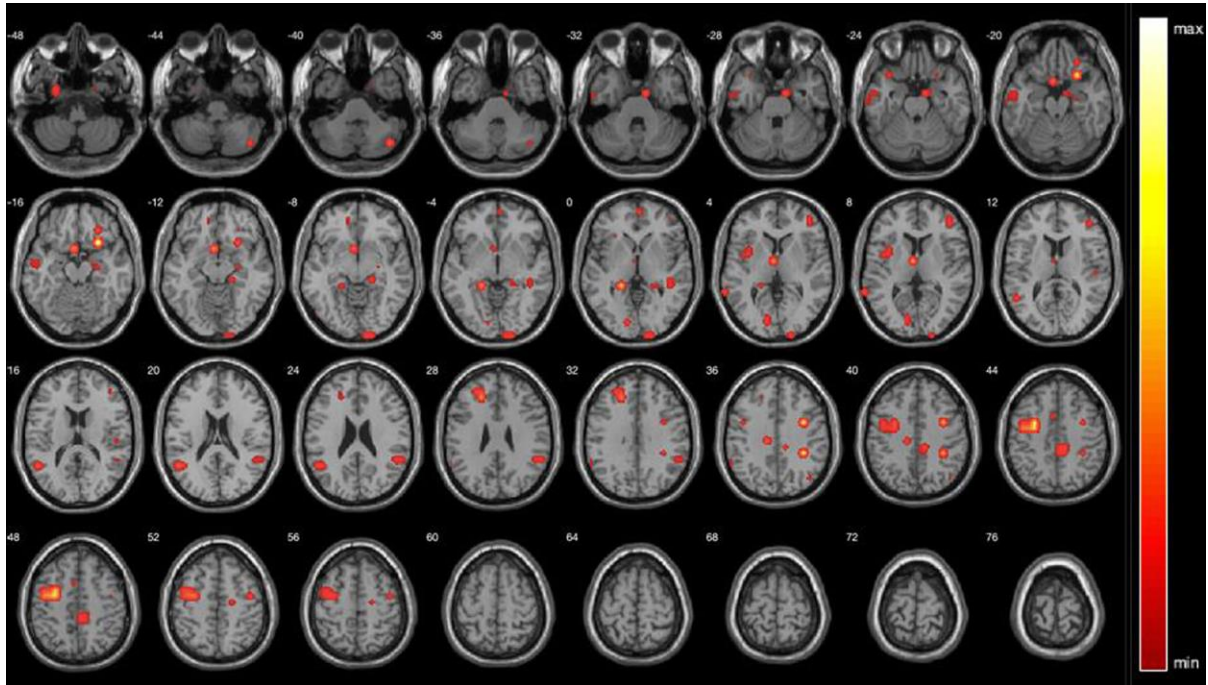

**Supplementary Figure 1. Weight distribution map to classification between AD patients and NCs which is reconstructed by combining voxel information that is entered into the model and top 6% of the model parameters.** The color bar represents the weight value from GSplit LBI model, the larger the weight value of the model, the warmer the color in the graph.
