# Supplementary material for: Application of Generalized Split Linearized Bregman Iteration algorithm for Alzheimer's disease prediction
Source: Aging (Albany NY). 2020 Apr 5;12(7):6206–24. doi: 10.18632/aging.103017 (PMC7185109; doi:10.18632/aging.103017)
Supplement: Supplementary Tables [file aging-12-103017-s001..pdf]

## SUPPLEMENTARY TABLES

**Supplementary Table 1. Performance (accuracy, sensitivity, specificity) of ten experiments, each experiment is a ten-fold cross-validation.**

|         | accuracy | sensitivity | specificity |
|---------|----------|-------------|-------------|
| 1st     | 90.45%   | 91.67%      | 88.50%      |
| 2nd     | 89.55%   | 91.00%      | 87.50%      |
| 3rd     | 91.36%   | 91.67%      | 92.00%      |
| 4th     | 90.45%   | 91.67%      | 90.00%      |
| 5th     | 90.45%   | 91.00%      | 89.50%      |
| 6th     | 90.55%   | 91.00%      | 89.50%      |
| 7th     | 89.55%   | 91.33%      | 87.00%      |
| 8th     | 90.45%   | 89.67%      | 91.50%      |
| 9th     | 91.36%   | 91.33%      | 91.00%      |
| 10th    | 90.27%   | 91.33%      | 88.50%      |
| average | 90.44%   | 91.17%      | 89.50%      |

**Supplementary Table 2. In previous study, the GSplit LBI-based classifier had been compared with other classifiers including MLDA, SVM, Lasso, Graphnet, Elastic Net, TV+l1 and n<sup>2</sup>GFL and obtained better results than other models on ADNI dataset.**

|          | SVM    | Lasso  | Elastic Net | MLDA   | Graphnet | TV+l1  | n <sup>2</sup> GFL | GSplit LBI |
|----------|--------|--------|-------------|--------|----------|--------|--------------------|------------|
| ADNI     | 87.50% | 87.50% | 89.2%       | 86.93% | 88.64%   | 87.50% | 87.50%             | 90.91%     |
| In-house | 87.20% | 87.20% | 89.50%      | -      | -        | -      | -                  | 90.44%     |

In this study, some comparative experiments including SVM, Lasso and Elastic Net also have been done to prove the performance of the GSplit LBI-based model on our in-house dataset. The result of comparative experiments between GSplit LBI-based classifier and other classifiers on ADNI dataset and our in-house dataset are shown in this table.
